# Supplementary material for: Experimental and theoretical investigations into the counter-intuitive shift in the antisymmetric ν(Si–O) vibrational modes upon deuteration of solvated silicic acid (H4SiO4)
Source: Royal Society of Chemistry journal article supplement (doi:10.1039/c0cp01664k), 2010-11-29
Supplement: c0cp01664k.pdf [file c0cp01664k.pdf]

**Table S1.** Cartesian coordinates/ Å of all atoms in the H<sub>4</sub>SiO<sub>4</sub>.28H<sub>2</sub>O (D<sub>4</sub>SiO<sub>4</sub>.28D<sub>2</sub>O) minima discussed in this work.

| Atom | x         | y         | z         |
|------|-----------|-----------|-----------|
| Si   | -0.121008 | -0.052497 | 0.932765  |
| O    | -0.393294 | 0.475367  | 2.469547  |
| O    | -1.566069 | -0.338398 | 0.157087  |
| O    | 0.713756  | 1.115531  | 0.133938  |
| O    | 0.761794  | -1.448443 | 1.105504  |
| H/D  | -1.479598 | -0.516108 | -0.823623 |
| H/D  | 0.900867  | -2.122675 | 0.373478  |
| H/D  | 0.185918  | 1.658057  | -0.522616 |
| H/D  | -0.786249 | -0.148821 | 3.145039  |
| H/D  | -4.333563 | -1.448772 | -2.604266 |
| O    | -3.709222 | -2.160852 | -2.847964 |
| H/D  | -2.834176 | -1.720503 | -2.861793 |
| H/D  | -1.314152 | -2.113359 | 3.866919  |
| O    | -1.277075 | -1.239235 | 4.337933  |
| H/D  | -2.157351 | -1.096769 | 4.717902  |
| H/D  | -5.589971 | -0.333315 | -0.12954  |
| O    | -5.469431 | -0.342032 | 0.841769  |
| H/D  | -4.94471  | -1.152344 | 1.039071  |
| H/D  | 1.106473  | -2.997718 | -3.863273 |
| O    | 1.054849  | -2.474128 | -3.049072 |
| H/D  | 1.676394  | -1.680052 | -3.156205 |
| H/D  | -1.651194 | 2.571007  | -1.617996 |
| O    | -0.66898  | 2.603588  | -1.648798 |
| H/D  | -0.386522 | 3.587164  | -1.505454 |
| H/D  | 0.146401  | 4.54808   | 1.732921  |
| O    | -0.564197 | 5.156809  | 1.445105  |
| H/D  | -1.415371 | 4.760783  | 1.730084  |
| H/D  | -2.836904 | -1.620987 | 0.72461   |
| O    | -3.422778 | -2.275937 | 1.156723  |
| H/D  | -3.585665 | -2.976344 | 0.448536  |
| H/D  | -0.14052  | 1.885015  | -3.04697  |
| O    | 0.11019   | 1.215237  | -3.750406 |
| H/D  | -0.03754  | 1.634141  | -4.611921 |
| O    | 0.0644    | 5.034236  | -1.229981 |
| H/D  | 1.053707  | 5.042768  | -1.15681  |
| H/D  | -0.247079 | 5.229101  | -0.308216 |

|     |           |           |           |
|-----|-----------|-----------|-----------|
| O   | -1.254622 | -3.28944  | 2.536321  |
| H/D | -2.092474 | -3.010052 | 2.079407  |
| H/D | -0.533648 | -2.845104 | 2.050483  |
| O   | -3.603505 | 1.566001  | 1.006444  |
| H/D | -4.379493 | 0.931643  | 1.063899  |
| H/D | -2.829869 | 0.978449  | 0.891573  |
| O   | 2.469253  | -0.279523 | -3.247611 |
| H/D | 2.965428  | -0.024356 | -2.432714 |
| H/D | 1.781104  | 0.402786  | -3.402689 |
| O   | -1.186209 | -0.911478 | -2.494558 |
| H/D | -0.488218 | -1.589162 | -2.663351 |
| H/D | -0.894313 | -0.142406 | -3.039477 |
| O   | -1.112707 | -5.082559 | 0.040804  |
| H/D | -1.201015 | -4.893045 | 0.993006  |
| H/D | -0.29523  | -4.612502 | -0.226994 |
| O   | -5.270511 | 0.169475  | -2.016257 |
| H/D | -6.035412 | 0.373189  | -2.576028 |
| H/D | -4.708026 | 0.980321  | -2.005011 |
| O   | -3.567185 | 2.402966  | -1.535914 |
| H/D | -3.639684 | 2.219019  | -0.554617 |
| H/D | -3.909138 | 3.302101  | -1.66692  |
| O   | 1.197866  | -3.474187 | -0.531338 |
| H/D | 1.252584  | -3.234906 | -1.489235 |
| H/D | 2.068675  | -3.865844 | -0.270178 |
| O   | -3.632823 | -4.065609 | -0.7864   |
| H/D | -3.648871 | -3.527416 | -1.612599 |
| H/D | -2.759011 | -4.51183  | -0.725438 |
| O   | 3.325435  | -0.523877 | 1.713726  |
| H/D | 2.455859  | -0.958745 | 1.549359  |
| H/D | 3.133105  | 0.12108   | 2.431678  |
| O   | 5.139042  | -2.501485 | 1.571819  |
| H/D | 5.718559  | -2.600503 | 2.342658  |
| H/D | 4.516981  | -1.745269 | 1.767506  |
| O   | 3.62207   | -4.487949 | 0.299151  |
| H/D | 3.584397  | -5.333643 | 0.770345  |
| H/D | 4.174123  | -3.881477 | 0.843547  |
| O   | -3.06732  | 4.035454  | 2.177444  |
| H/D | -3.385034 | 4.151693  | 3.084267  |
| H/D | -3.29105  | 3.115491  | 1.912923  |
| O   | 1.691488  | 3.37521   | 1.662345  |
| H/D | 2.030535  | 2.964158  | 2.479694  |
| H/D | 1.400439  | 2.610716  | 1.121442  |
| O   | 4.028195  | 0.357379  | -1.021651 |

|     |          |           |           |
|-----|----------|-----------|-----------|
| H/D | 3.649778 | 0.261369  | -0.122526 |
| H/D | 4.824261 | -0.230105 | -1.022638 |
| O   | 2.077265 | 1.238476  | 3.554366  |
| H/D | 2.138354 | 1.201941  | 4.521107  |
| H/D | 1.14583  | 1.001862  | 3.32206   |
| O   | 2.732972 | 4.835038  | -0.578434 |
| H/D | 2.593676 | 4.447591  | 0.308569  |
| H/D | 3.410933 | 4.266051  | -1.004674 |
| O   | 6.136548 | -1.437413 | -0.837682 |
| H/D | 5.92579  | -1.916147 | -0.005968 |
| H/D | 6.194129 | -2.110169 | -1.532646 |
| O   | 4.653958 | 3.038374  | -1.615811 |
| H/D | 4.463305 | 2.094803  | -1.407924 |
| H/D | 4.922338 | 3.062268  | -2.545678 |
